# Supplementary material for: Minithoracotomy versus sternotomy in mitral valve surgery: meta-analysis from recent matched and randomized studies
Source: PubMed Central journal article supplement (PMC10080824; doi:10.1186/s13019-023-02229-x), 2023-04-06

### Forest Plot - Stroke

| Robotic        | ID                      | LogOR        | Lower        | Upper       | p-value     | Weight | Weight (%) |
|----------------|-------------------------|--------------|--------------|-------------|-------------|--------|------------|
| 0              | Grossi 2014             | -0.12        | -1.08        | 0.84        | 0.81        | 4.14   | 11.29      |
|                | Nasso 2014              | 1.11         | -2.10        | 4.33        | 0.50        | 0.37   | 1.01       |
|                | Nishi 2015              | 0.00         | -1.14        | 1.14        | 1.00        | 2.98   | 8.12       |
|                | Downs 2016              | 0.00         | -1.61        | 1.61        | 1.00        | 1.49   | 4.06       |
|                | Hawkins 2018            | -1.11        | -4.33        | 2.10        | 0.50        | 0.37   | 1.01       |
|                | Grant 2019              | 0.29         | -0.58        | 1.16        | 0.51        | 5.06   | 13.80      |
|                | Liu 2019                | 0.41         | -1.39        | 2.21        | 0.65        | 1.19   | 3.23       |
|                | Paparella 2020          | 0.13         | -0.88        | 1.15        | 0.80        | 3.71   | 10.13      |
|                | Cetinkaya 2021          | 0.59         | -0.24        | 1.42        | 0.16        | 5.60   | 15.28      |
|                | Pojar 2021              | -0.07        | -1.58        | 1.44        | 0.93        | 1.68   | 4.59       |
|                | Olsthoorn 2022          | 0.70         | -0.51        | 1.90        | 0.26        | 2.65   | 7.22       |
|                | <b>Subgroup Overall</b> | <b>0.24</b>  | <b>-0.12</b> | <b>0.60</b> | <b>0.19</b> |        |            |
| 1              | Mihaljevic 2011         | -0.70        | -3.12        | 1.71        | 0.57        | 0.66   | 1.80       |
|                | Suri 2011               | -1.11        | -4.32        | 2.10        | 0.50        | 0.37   | 1.01       |
|                | Hawkins 2018            | -0.29        | -1.80        | 1.21        | 0.70        | 1.70   | 4.62       |
|                | Wang A 2018             | 0.46         | -0.50        | 1.42        | 0.35        | 4.20   | 11.47      |
|                | Coyan 2018              | 0.00         | -2.79        | 2.79        | 1.00        | 0.49   | 1.35       |
|                | <b>Subgroup Overall</b> | <b>0.08</b>  | <b>-0.64</b> | <b>0.80</b> | <b>0.84</b> |        |            |
| <b>Overall</b> | <b>0.21</b>             | <b>-0.12</b> | <b>0.53</b>  | <b>0.21</b> |             |        |            |

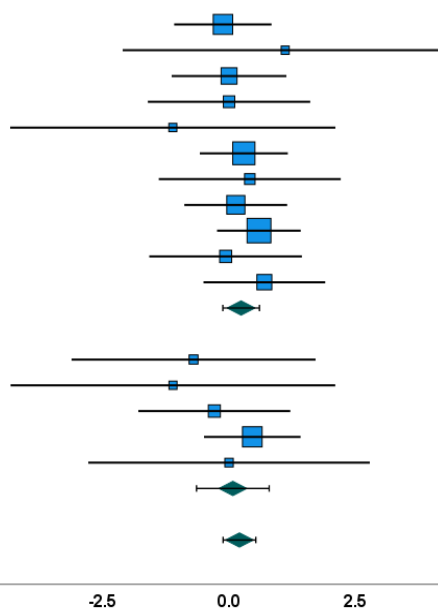

Model: Random-effects model  
 Heterogeneity: Tau-squared = 0.00, I-squared = 1.00, H-squared = 0.00  
 Homogeneity: Q = 5.19, df = 15, p-value = 0.99  
 Test of between-subgroup homogeneity: Q = 0.16, df = 1, p-value = 0.69

In Favor Sternotomy | In Favor Mini-Thoracotomy

### Forest Plot - Reoperation for bleeding

| Robotic                 | ID                      | LogOR        | Lower        | Upper       | p-value     | Weight | Weight (%) |
|-------------------------|-------------------------|--------------|--------------|-------------|-------------|--------|------------|
| 0                       | Nishi 2015              | -0.91        | -1.69        | -0.13       | 0.02        | 6.28   | 7.38       |
|                         | Downs 2016              | -0.23        | -1.01        | 0.54        | 0.56        | 6.42   | 7.55       |
|                         | Hawkins 2018            | -0.71        | -3.13        | 1.72        | 0.57        | 0.65   | 0.77       |
|                         | Wang Q 2018             | -0.72        | -2.46        | 1.01        | 0.41        | 1.28   | 1.51       |
|                         | Grant 2019              | 0.10         | -0.41        | 0.62        | 0.69        | 14.49  | 17.04      |
|                         | Liu 2019                | -0.42        | -1.70        | 0.86        | 0.52        | 2.34   | 2.76       |
|                         | Paparella 2020          | -0.00        | -0.45        | 0.45        | 1.00        | 18.99  | 22.34      |
|                         | Pojar 2021              | 1.09         | 0.09         | 2.10        | 0.03        | 3.83   | 4.50       |
|                         | Olsthoorn 2022          | -0.03        | -0.49        | 0.43        | 0.91        | 18.21  | 21.42      |
|                         | <b>Subgroup Overall</b> | <b>-0.06</b> | <b>-0.29</b> | <b>0.17</b> | <b>0.61</b> |        |            |
| 1                       | Mihaljevic 2011         | 0.00         | -1.41        | 1.41        | 1.00        | 1.92   | 2.26       |
|                         | Suri 2011               | 0.70         | -1.71        | 3.12        | 0.57        | 0.66   | 0.77       |
|                         | Hawkins 2018            | -0.29        | -1.36        | 0.78        | 0.59        | 3.35   | 3.94       |
|                         | Wang A 2018             | -0.42        | -1.23        | 0.39        | 0.31        | 5.86   | 6.89       |
|                         | Coyan 2018              | -1.12        | -3.40        | 1.16        | 0.34        | 0.74   | 0.87       |
| <b>Subgroup Overall</b> | <b>-0.30</b>            | <b>-0.86</b> | <b>0.25</b>  | <b>0.28</b> |             |        |            |
| <b>Overall</b>          | <b>-0.10</b>            | <b>-0.31</b> | <b>0.12</b>  | <b>0.38</b> |             |        |            |

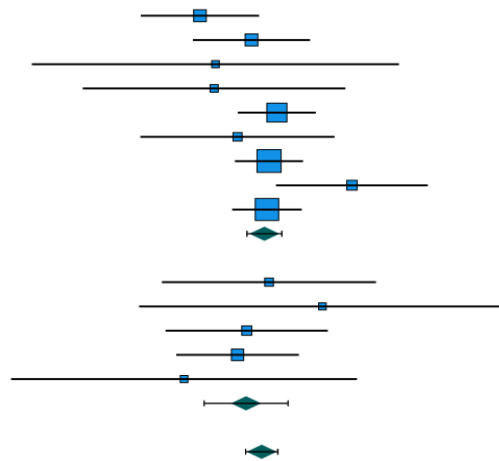

Model: Random-effects model  
 Heterogeneity: Tau-squared = 0.00, I-squared = 1.00, H-squared = 0.00  
 Homogeneity: Q = 13.48, df = 13, p-value = 0.41  
 Test of between-subgroup homogeneity: Q = 0.62, df = 1, p-value = 0.43

In Favor Sternotomy | In Favor Mini-Thoracotomy

**Forest Plot - Renal Failure**

| Robotic        | ID                      | LogOR       | Lower        | Upper       | p-value     | Weight | Weight (%) |
|----------------|-------------------------|-------------|--------------|-------------|-------------|--------|------------|
| 0              | Nishi 2015              | 0.32        | -0.59        | 1.24        | 0.49        | 2.11   | 11.21      |
|                | Downs 2016              | -0.70       | -2.40        | 1.00        | 0.42        | 0.99   | 5.26       |
|                | Hawkins 2018            | 0.42        | -1.40        | 2.24        | 0.65        | 0.89   | 4.76       |
|                | Wang Q 2018             | 0.00        | -1.99        | 1.99        | 1.00        | 0.78   | 4.14       |
|                | Grant 2019              | 0.29        | -0.77        | 1.36        | 0.59        | 1.81   | 9.66       |
|                | Liu 2019                | 1.96        | -1.01        | 4.93        | 0.20        | 0.39   | 2.09       |
|                | Paparella 2020          | 0.11        | -0.18        | 0.41        | 0.45        | 3.58   | 19.07      |
|                | Cetinkaya 2021          | 1.82        | 1.10         | 2.54        | 0.00        | 2.55   | 13.57      |
|                | Pojar 2021              | 0.05        | -1.23        | 1.34        | 0.93        | 1.46   | 7.79       |
|                | Olsthoorn 2022          | 0.85        | -0.50        | 2.21        | 0.22        | 1.36   | 7.24       |
|                | <b>Subgroup Overall</b> | <b>0.50</b> | <b>-0.02</b> | <b>1.02</b> | <b>0.06</b> |        |            |
| 1              | Suri 2011               | 1.11        | -2.10        | 4.32        | 0.50        | 0.34   | 1.81       |
|                | Hawkins 2018            | -0.70       | -3.10        | 1.71        | 0.57        | 0.57   | 3.02       |
|                | Wang A 2018             | 0.82        | -0.36        | 2.01        | 0.17        | 1.61   | 8.57       |
|                | Coyan 2018              | 1.10        | -2.12        | 4.31        | 0.50        | 0.34   | 1.81       |
|                | <b>Subgroup Overall</b> | <b>0.63</b> | <b>-0.33</b> | <b>1.59</b> | <b>0.20</b> |        |            |
| <b>Overall</b> |                         | <b>0.51</b> | <b>0.06</b>  | <b>0.96</b> | <b>0.03</b> |        |            |

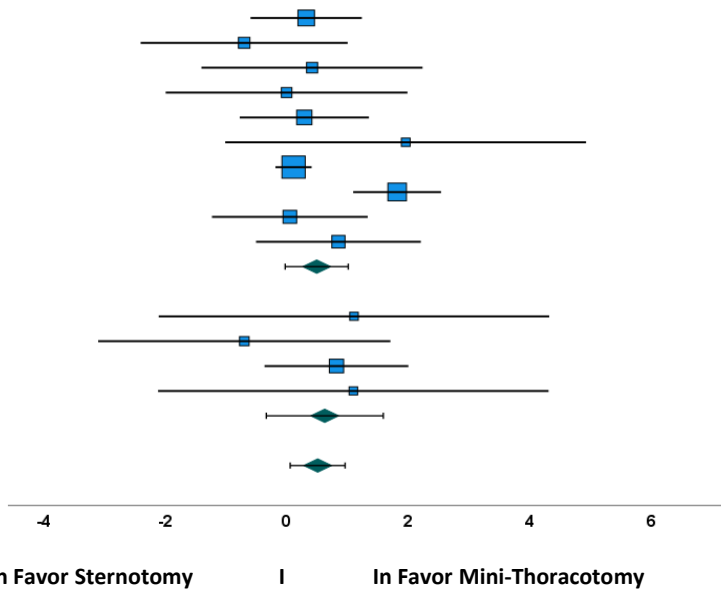

Model: Random-effects model  
 Heterogeneity: Tau-squared = 0.26, I-squared = 1.85, H-squared = 0.46  
 Homogeneity: Q = 23.46, df = 13, p-value = 0.04  
 Test of between-subgroup homogeneity: Q = 0.06, df = 1, p-value = 0.81

**Funnel Plot - Renal Failure**

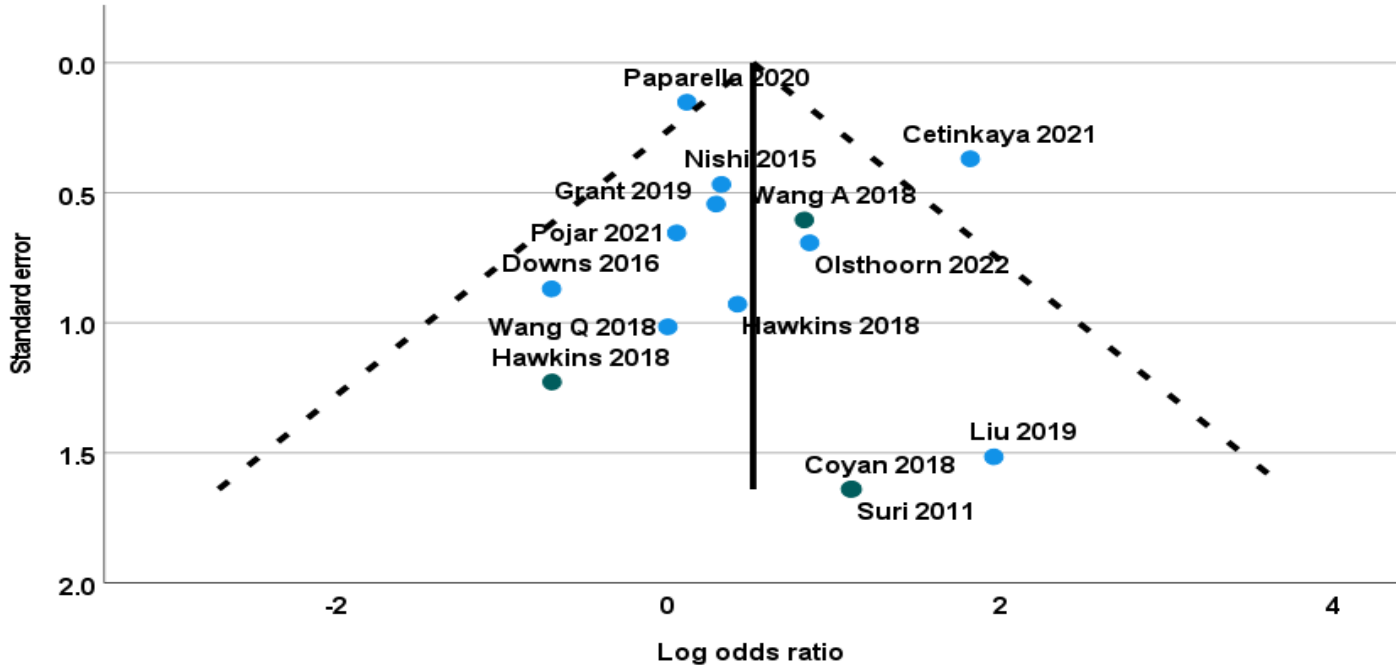

| Robotic | ID               | LogOR | Lower | Upper | p-value | Weight | Weight (%) |
|---------|------------------|-------|-------|-------|---------|--------|------------|
| 0       | Nishi 2015       | 0.12  | -0.15 | 0.38  | 0.38    | 24.85  | 12.17      |
|         | Downs 2016       | 0.20  | -0.19 | 0.59  | 0.32    | 16.07  | 7.87       |
|         | Hawkins 2018     | 0.16  | -0.62 | 0.94  | 0.69    | 5.50   | 2.69       |
|         | Wang Q 2018      | 0.32  | -0.80 | 1.44  | 0.57    | 2.88   | 1.41       |
|         | Liu 2019         | 0.35  | -0.82 | 1.51  | 0.56    | 2.67   | 1.31       |
|         | Paparella 2020   | 0.12  | -0.09 | 0.32  | 0.27    | 30.34  | 14.86      |
|         | Cetinkaya 2021   | 0.65  | 0.30  | 0.99  | 0.00    | 18.82  | 9.22       |
|         | Pojar 2021       | -0.01 | -0.43 | 0.40  | 0.95    | 14.96  | 7.33       |
|         | Olsthoorn 2022   | 0.46  | 0.22  | 0.69  | 0.00    | 27.51  | 13.47      |
|         | Subgroup Overall | 0.26  | 0.09  | 0.43  | 0.00    |        |            |
| 1       | Mihaljevic 2011  | 0.19  | -0.41 | 0.78  | 0.54    | 8.68   | 4.25       |
|         | Hawkins 2018     | 0.15  | -0.21 | 0.50  | 0.41    | 18.24  | 8.93       |
|         | Wang A 2018      | 0.54  | 0.27  | 0.80  | 0.00    | 24.95  | 12.22      |
|         | Coyan 2018       | 0.14  | -0.46 | 0.74  | 0.65    | 8.67   | 4.25       |
|         | Subgroup Overall | 0.31  | 0.06  | 0.57  | 0.02    |        |            |
| Overall |                  | 0.27  | 0.14  | 0.41  | 0.00    |        |            |

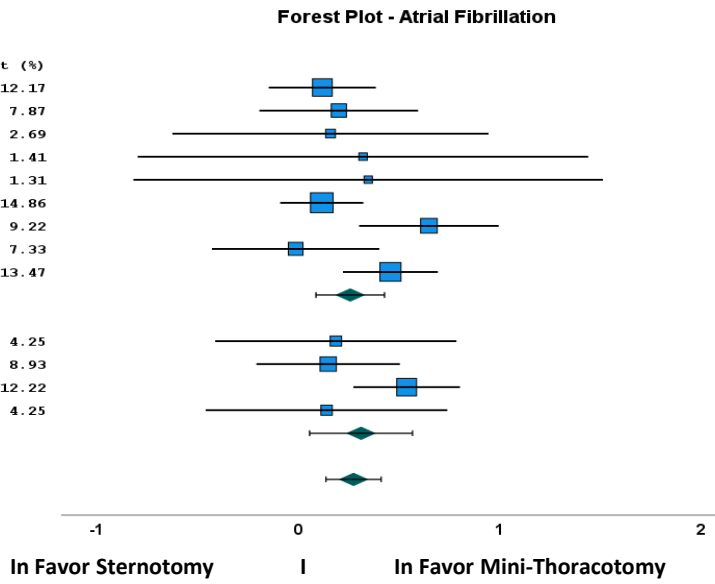

Model: Random-effects model  
Heterogeneity: Tau-squared = 0.02, I-squared = 1.65, H-squared = 0.39  
Homogeneity: Q = 16.96, df = 12, p-value = 0.15  
Test of between-subgroup homogeneity: Q = 0.12, df = 1, p-value = 0.73

### Funnel Plot - Atrial Fibrillation

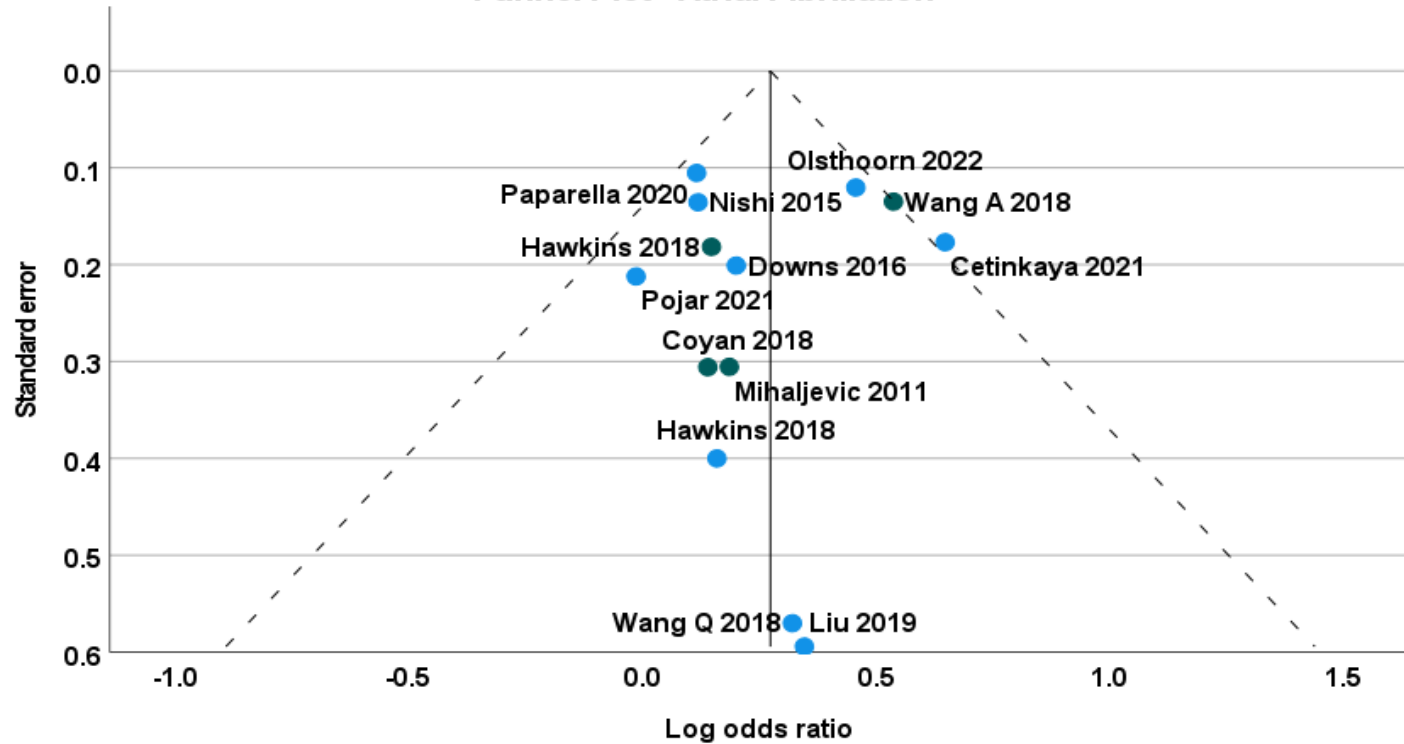

### Forest Plot - Blood transfusion

| Robotic        | ID                      | LogOR       | Lower       | Upper       | p-value     | Weight | Weight (%) |
|----------------|-------------------------|-------------|-------------|-------------|-------------|--------|------------|
| 0              | Nishi 2015              | -0.13       | -0.34       | 0.08        | 0.24        | 7.09   | 11.25      |
|                | Downs 2016              | 1.09        | 0.69        | 1.49        | 0.00        | 5.85   | 9.27       |
|                | Hawkins 2018            | 1.12        | 0.22        | 2.01        | 0.01        | 2.96   | 4.69       |
|                | Wang Q 2018             | 1.42        | 0.66        | 2.18        | 0.00        | 3.58   | 5.67       |
|                | Grant 2019              | 0.43        | 0.13        | 0.72        | 0.00        | 6.59   | 10.44      |
|                | Liu 2019                | 0.46        | 0.03        | 0.89        | 0.04        | 5.60   | 8.88       |
|                | Paparella 2020          | 0.33        | 0.17        | 0.49        | 0.00        | 7.35   | 11.65      |
|                | Pojar 2021              | 0.74        | 0.30        | 1.18        | 0.00        | 5.56   | 8.82       |
|                | <b>Subgroup Overall</b> | <b>0.60</b> | <b>0.26</b> | <b>0.94</b> | <b>0.00</b> |        |            |
| 1              | Mihaljevic 2011         | 0.78        | -0.12       | 1.67        | 0.09        | 2.96   | 4.69       |
|                | Suri 2011               | 0.63        | -0.21       | 1.46        | 0.14        | 3.22   | 5.10       |
|                | Hawkins 2018            | 0.18        | -0.24       | 0.61        | 0.39        | 5.69   | 9.02       |
|                | Wang I 2018             | 0.75        | 0.46        | 1.03        | 0.00        | 6.65   | 10.54      |
|                | <b>Subgroup Overall</b> | <b>0.56</b> | <b>0.21</b> | <b>0.90</b> | <b>0.00</b> |        |            |
| <b>Overall</b> |                         | <b>0.57</b> | <b>0.33</b> | <b>0.82</b> | <b>0.00</b> |        |            |

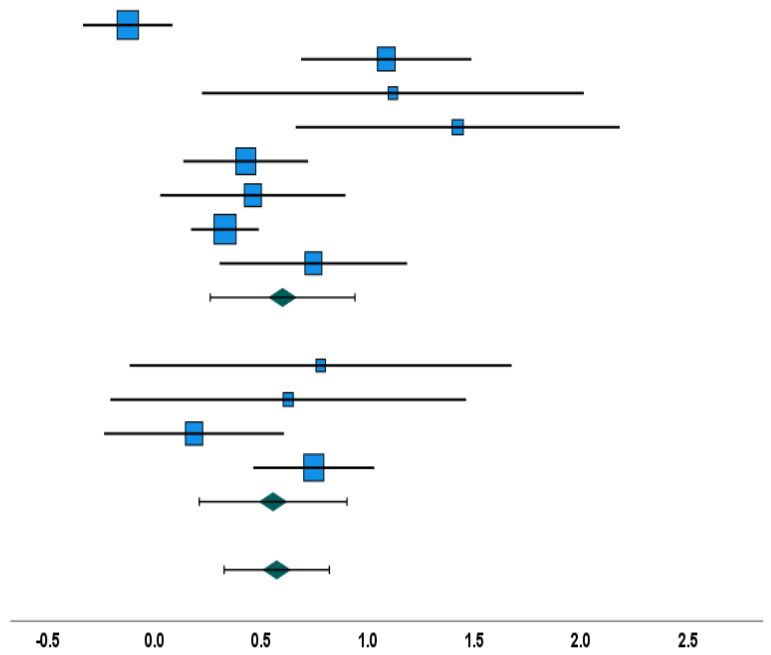

Model: Random-effects model

Heterogeneity: Tau-squared = 0.13, I-squared = 5.18, H-squared = 0.81

Homogeneity: Q = 55.68, df = 11, p-value = 0.00

Test of overall effect size: z = 4.55, p-value = 0.00

Test of between-subgroup homogeneity: Q = 0.03, df = 1, p-value = 0.86

In Favor Sternotomy

|

In Favor Mini-Thoracotomy

### Funnel Plot - Blood Transfusions

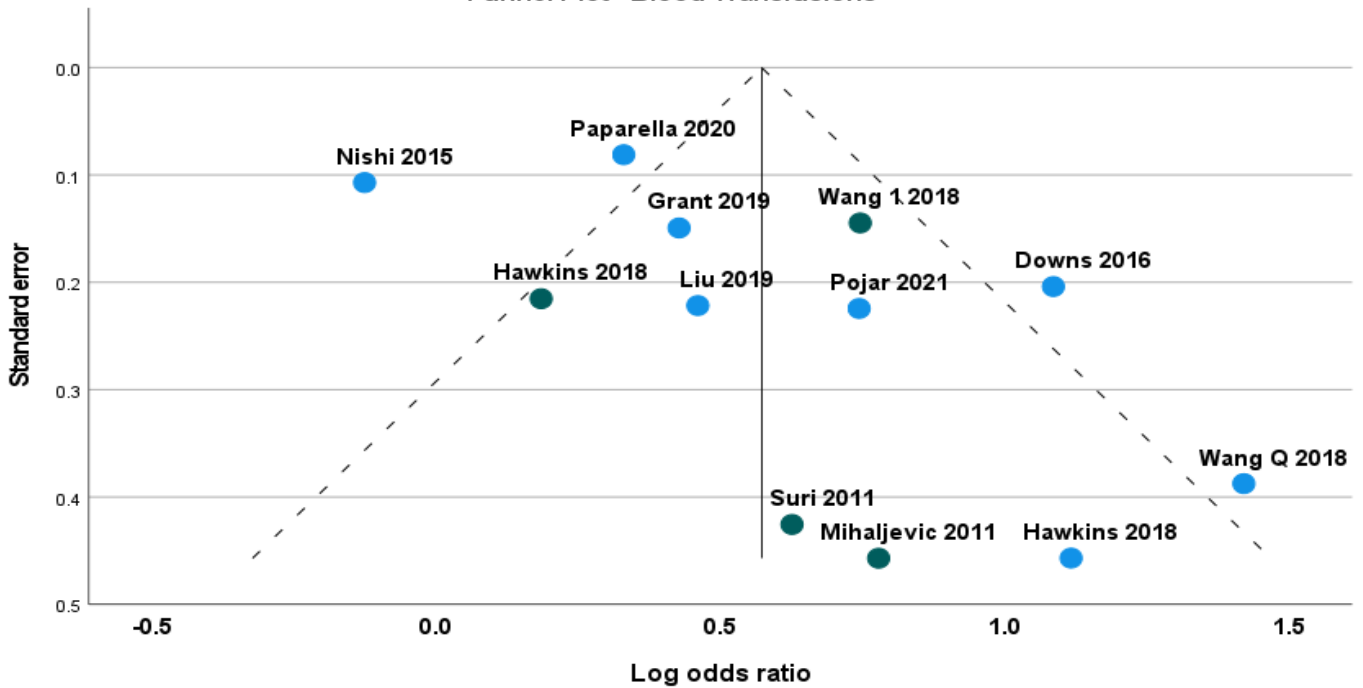

### Forest Plot - Prolonged ventilation

| Robotic        | ID                      | LogOR        | Lower        | Upper       | p-value     | Weight | Weight (%) |
|----------------|-------------------------|--------------|--------------|-------------|-------------|--------|------------|
| 0              | Nishi 2015              | -0.71        | -1.47        | 0.06        | 0.07        | 2.80   | 13.38      |
|                | Downs 2016              | -0.54        | -1.20        | 0.12        | 0.11        | 3.16   | 15.07      |
|                | Hawkins 2018            | 0.43         | -0.87        | 1.74        | 0.52        | 1.54   | 7.35       |
|                | Wang Q 2018             | 0.54         | -0.93        | 2.02        | 0.47        | 1.30   | 6.21       |
|                | Pojar 2021              | 0.93         | 0.16         | 1.71        | 0.02        | 2.77   | 13.25      |
|                | Olsthoorn 2022          | 0.29         | -0.77        | 1.35        | 0.59        | 2.01   | 9.58       |
|                | <b>Subgroup Overall</b> | <b>0.08</b>  | <b>-0.52</b> | <b>0.68</b> | <b>0.79</b> |        |            |
| 1              | Mihaljevic 2011         | 0.42         | -1.39        | 2.22        | 0.65        | 0.95   | 4.52       |
|                | Suri 2011               | 0.00         | -2.79        | 2.79        | 1.00        | 0.45   | 2.15       |
|                | Hawkins 2018            | 0.34         | -0.39        | 1.07        | 0.36        | 2.91   | 13.91      |
|                | Wang A 2018             | 0.64         | -0.05        | 1.32        | 0.07        | 3.06   | 14.61      |
|                | <b>Subgroup Overall</b> | <b>0.48</b>  | <b>0.00</b>  | <b>0.95</b> | <b>0.05</b> |        |            |
| <b>Overall</b> | <b>0.20</b>             | <b>-0.23</b> | <b>0.63</b>  | <b>0.36</b> |             |        |            |

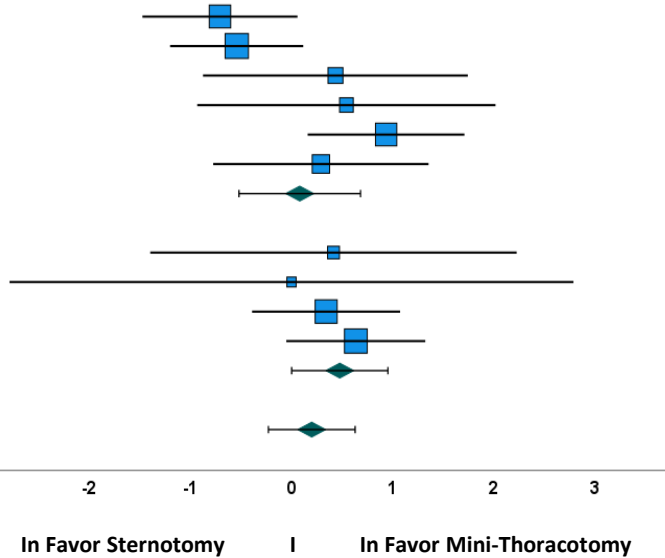

Model: Random-effects model  
 Heterogeneity: Tau-squared = 0.20, I-squared = 1.90, H-squared = 0.47  
 Homogeneity: Q = 15.78, df = 9, p-value = 0.07  
 Test of between-subgroup homogeneity: Q = 1.03, df = 1, p-value = 0.31

### Forest Plot - Wound infection

| Robotic                 | ID                      | LogOR       | Lower        | Upper       | p-value     | Weight | Weight (%) |
|-------------------------|-------------------------|-------------|--------------|-------------|-------------|--------|------------|
| 0                       | Grossi 2014             | 0.31        | -0.32        | 0.93        | 0.34        | 4.73   | 33.51      |
|                         | Nishi 2015              | 1.61        | -1.43        | 4.65        | 0.30        | 0.40   | 2.82       |
|                         | Downs 2016              | 0.00        | -3.92        | 3.92        | 1.00        | 0.24   | 1.72       |
|                         | Hawkins 2018            | 0.00        | -3.93        | 3.93        | 1.00        | 0.24   | 1.71       |
|                         | Liu 2019                | 1.74        | 0.49         | 2.99        | 0.01        | 1.94   | 13.77      |
|                         | Paparella 2020          | 0.34        | -0.33        | 1.00        | 0.32        | 4.46   | 31.62      |
|                         | Cetinkaya 2021          | 0.00        | -3.92        | 3.92        | 1.00        | 0.24   | 1.72       |
|                         | Pojar 2021              | 1.76        | -0.33        | 3.84        | 0.10        | 0.80   | 5.69       |
|                         | <b>Subgroup Overall</b> | <b>0.66</b> | <b>0.09</b>  | <b>1.23</b> | <b>0.02</b> |        |            |
|                         | 1                       | Wang A 2018 | 1.10         | -1.16       | 3.37        | 0.34   | 0.69       |
| Coyan 2018              |                         | 1.11        | -2.10        | 4.32        | 0.50        | 0.36   | 2.53       |
| <b>Subgroup Overall</b> |                         | <b>1.10</b> | <b>-0.75</b> | <b>2.96</b> | <b>0.24</b> |        |            |
| <b>Overall</b>          | <b>0.68</b>             | <b>0.15</b> | <b>1.20</b>  | <b>0.01</b> |             |        |            |

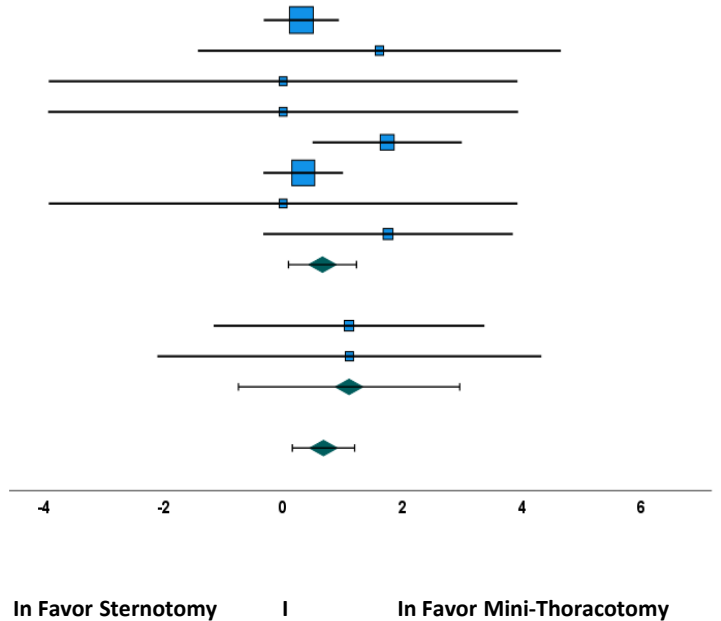

Model: Random-effects model  
 Heterogeneity: Tau-squared = 0.11, I-squared = 1.20, H-squared = 0.17  
 Homogeneity: Q = 6.78, df = 9, p-value = 0.66  
 Test of overall effect size: z = 2.54, p-value = 0.01  
 Test of between-subgroup homogeneity: Q = 0.70, df = 1, p-value = 0.65

### Funnel Plot - Wound infection

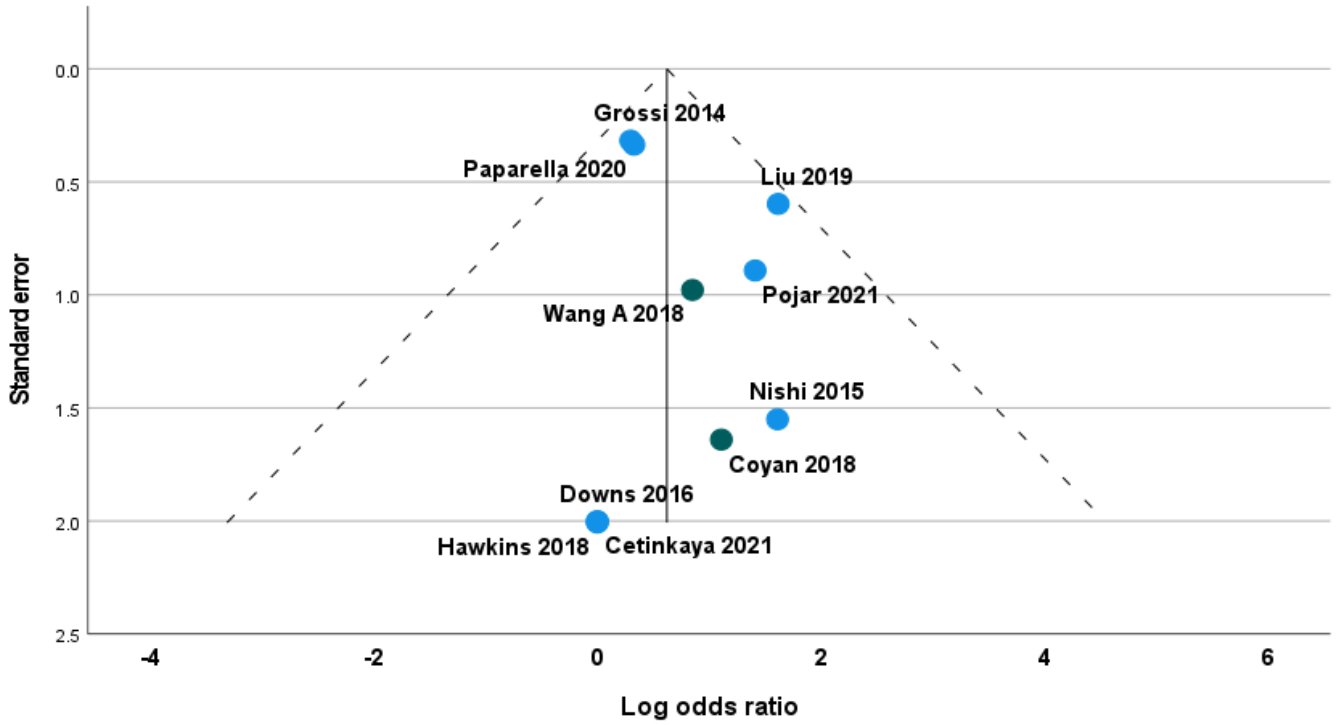

### Forest Plot - Mid-term Reoperation

| Robotic        | ID                      | LogOR        | Lower        | Upper       | p-value     | Weight | Weight (%) |
|----------------|-------------------------|--------------|--------------|-------------|-------------|--------|------------|
| 0              | Nasso 2014              | -0.71        | -3.13        | 1.72        | 0.57        | 0.66   | 2.95       |
|                | Wang Q 2018             | 0.76         | -0.67        | 2.19        | 0.30        | 1.88   | 8.45       |
|                | Grant 2019              | -0.49        | -1.28        | 0.31        | 0.23        | 6.03   | 27.15      |
|                | Liu 2019                | 0.73         | -1.68        | 3.14        | 0.55        | 0.66   | 2.98       |
|                | Pojar 2021              | 0.08         | -0.98        | 1.13        | 0.89        | 3.46   | 15.57      |
|                | Olsthoorn 2022          | -0.47        | -1.15        | 0.22        | 0.18        | 8.13   | 36.58      |
|                | <b>Subgroup Overall</b> | <b>-0.24</b> | <b>-0.67</b> | <b>0.19</b> | <b>0.27</b> |        |            |
| 1              | Wang A 2018             | -0.82        | -2.48        | 0.83        | 0.33        | 1.41   | 6.33       |
|                | <b>Subgroup Overall</b> | <b>-0.82</b> | <b>-2.48</b> | <b>0.83</b> | <b>0.33</b> |        |            |
| <b>Overall</b> |                         | <b>-0.28</b> | <b>-0.69</b> | <b>0.14</b> | <b>0.19</b> |        |            |

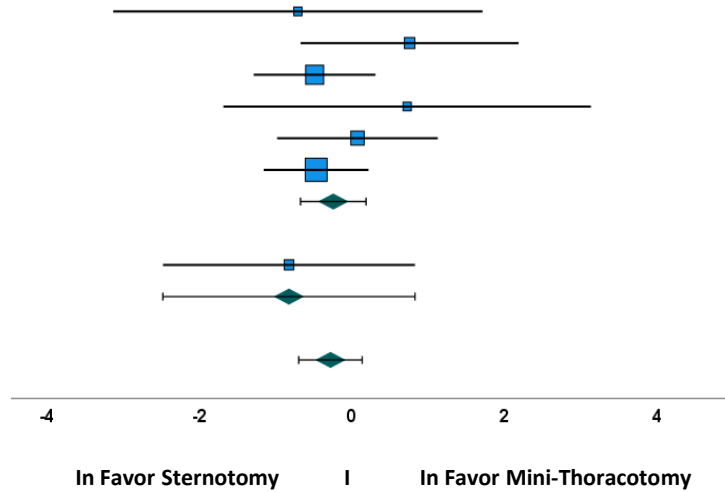

Model: Random-effects model  
 Heterogeneity: Tau-squared = 0.00, I-squared = 1.00, H-squared = 0.00  
 Homogeneity: Q = 4.20, df = 6, p-value = 0.65  
 Test of between-subgroup homogeneity: Q = 0.45, df = 1, p-value = 0.50

Forest Plot - Mid-term Mortality

| Robotic        | ID                      | LogOR       | Lower        | Upper       | p-value     | Weight | Weight (%) |
|----------------|-------------------------|-------------|--------------|-------------|-------------|--------|------------|
| 0              | Nasso 2014              | -0.01       | -2.80        | 2.78        | 0.99        | 0.48   | 1.28       |
|                | Wang Q 2018             | 0.00        | -3.93        | 3.93        | 1.00        | 0.25   | 0.65       |
|                | Grant 2019              | 0.73        | 0.27         | 1.20        | 0.00        | 9.50   | 25.28      |
|                | Liu 2019                | 0.26        | -1.07        | 1.59        | 0.70        | 1.96   | 5.22       |
|                | Cetinkaya 2021          | 0.64        | 0.13         | 1.15        | 0.01        | 8.60   | 22.86      |
|                | Pojar 2021              | 0.45        | -0.37        | 1.27        | 0.29        | 4.47   | 11.89      |
|                | Olsthoorn 2022          | -0.08       | -0.60        | 0.45        | 0.78        | 8.32   | 22.12      |
|                | <b>Subgroup Overall</b> | <b>0.42</b> | <b>0.07</b>  | <b>0.78</b> | <b>0.02</b> |        |            |
| 1              | Wang A 2018             | 0.25        | -0.63        | 1.13        | 0.58        | 4.02   | 10.69      |
|                | <b>Subgroup Overall</b> | <b>0.25</b> | <b>-0.63</b> | <b>1.13</b> | <b>0.58</b> |        |            |
| <b>Overall</b> |                         | <b>0.41</b> | <b>0.09</b>  | <b>0.73</b> | <b>0.01</b> |        |            |

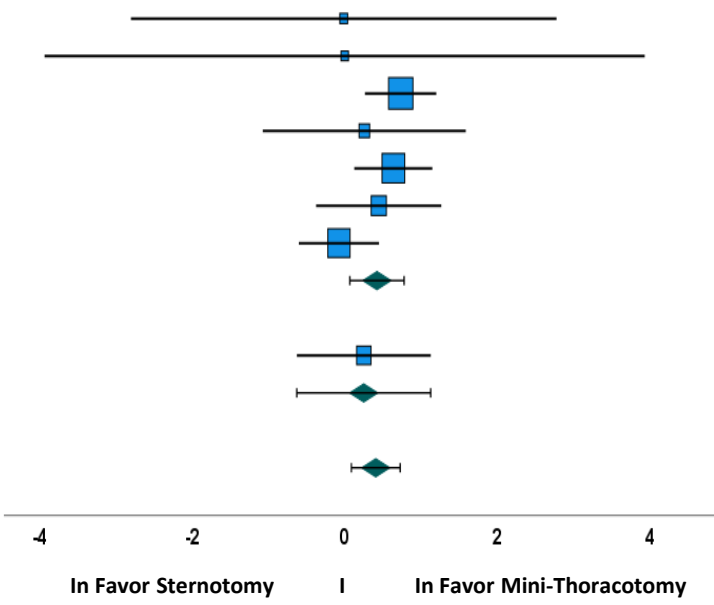

Model: Random-effects model  
 Heterogeneity: Tau-squared = 0.05, I-squared = 1.32, H-squared = 0.24  
 Homogeneity: Q = 6.19, df = 7, p-value = 0.52  
 Test of between-subgroup homogeneity: Q = 0.13, df = 1, p-value = 0.72

Funnel Plot - Mid-term Mortality

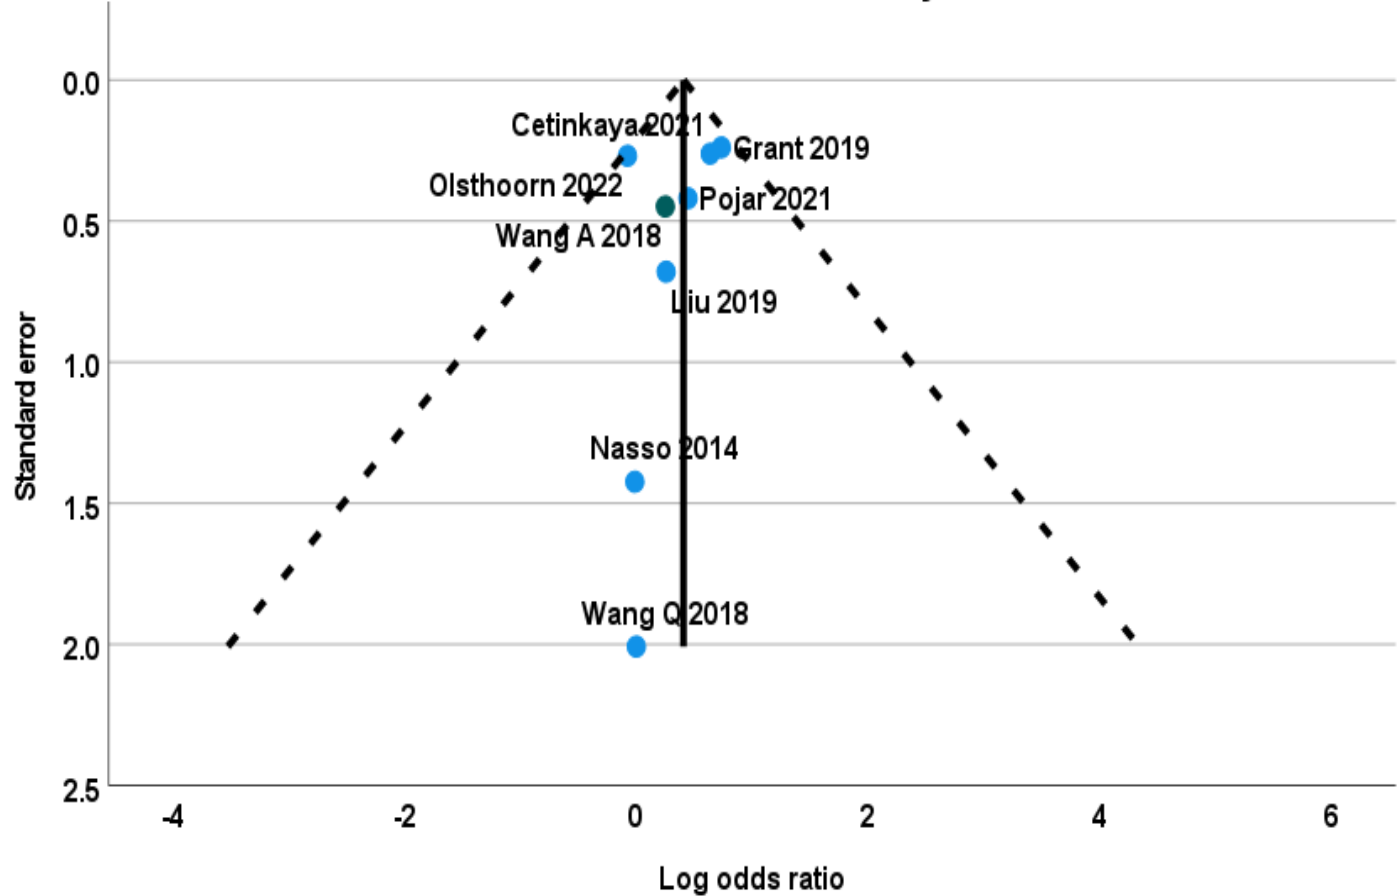

### Forest Plot - Clamp Time

| Robotic          | ID               | Mean difference | Lower  | Upper | p-value | Weight | Weight (%) |      |
|------------------|------------------|-----------------|--------|-------|---------|--------|------------|------|
| 0                | Nasso 2014       | 22.00           | 15.63  | 28.37 | 0.00    | 0.01   | 6.34       |      |
|                  | Mishi 2015       | 30.00           | 25.65  | 34.35 | 0.00    | 0.01   | 6.61       |      |
|                  | Downs 2016       | 24.50           | 19.98  | 29.02 | 0.00    | 0.01   | 6.59       |      |
|                  | Hawkins 2018     | 21.40           | 12.97  | 29.83 | 0.00    | 0.01   | 5.99       |      |
|                  | Wang Q 2018      | 12.90           | 6.50   | 19.30 | 0.00    | 0.01   | 6.33       |      |
|                  | Grant 2019       | 28.50           | 25.44  | 31.56 | 0.00    | 0.01   | 6.74       |      |
|                  | Liu 2019         | 37.47           | 33.19  | 41.75 | 0.00    | 0.01   | 6.62       |      |
|                  | Paparella 2020   | 5.00            | 2.80   | 7.20  | 0.00    | 0.01   | 6.80       |      |
|                  | Cetinkaya 2021   | 7.90            | 4.74   | 11.06 | 0.00    | 0.01   | 6.73       |      |
|                  | Pojar 2021       | 12.90           | 7.42   | 18.38 | 0.00    | 0.01   | 6.47       |      |
|                  | Subgroup Overall |                 | 20.23  | 13.62 | 26.85   | 0.00   |            |      |
|                  | 1                | Mihaljevic 2011 | 28.00  | 21.35 | 34.65   | 0.00   | 0.01       | 6.30 |
| Suri 2011        |                  | 45.46           | 38.53  | 52.39 | 0.00    | 0.01   | 6.25       |      |
| Iyigun 2017      |                  | 10.55           | -11.13 | 32.23 | 0.34    | 0.00   | 3.48       |      |
| Hawkins 2018     |                  | 18.60           | 14.55  | 22.65 | 0.00    | 0.01   | 6.65       |      |
| Wang A 2018      |                  | 6.00            | 1.54   | 10.46 | 0.01    | 0.01   | 6.60       |      |
| Coyan 2018       |                  | 16.00           | 4.96   | 27.04 | 0.00    | 0.01   | 5.49       |      |
| Subgroup Overall |                  | 21.37           | 9.56   | 33.17 | 0.00    |        |            |      |
| Overall          |                  | 20.68           | 14.92  | 26.45 | 0.00    |        |            |      |

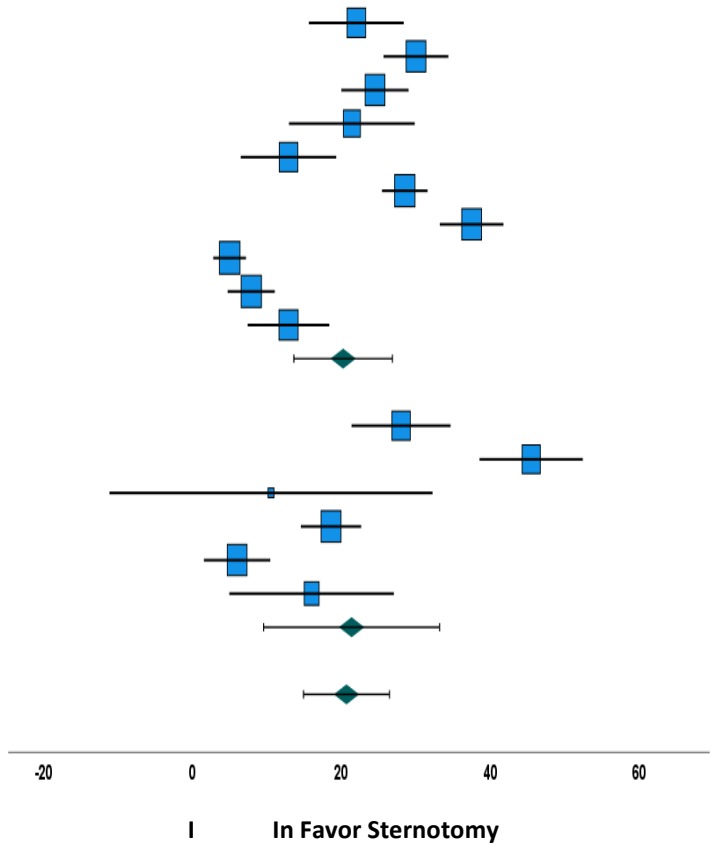

Model: Random-effects model

Heterogeneity: Tau-squared = 125.87, I-squared = 24.60, H-squared = 0.96

Homogeneity: Q = 439.18, df = 15, p-value = 0.00

Test of overall effect size: z = 7.03, p-value = 0.00

Test of between-subgroup homogeneity: Q = 0.03, df = 1, p-value = 0.87

### Funnel Plot - Cross Clamp time

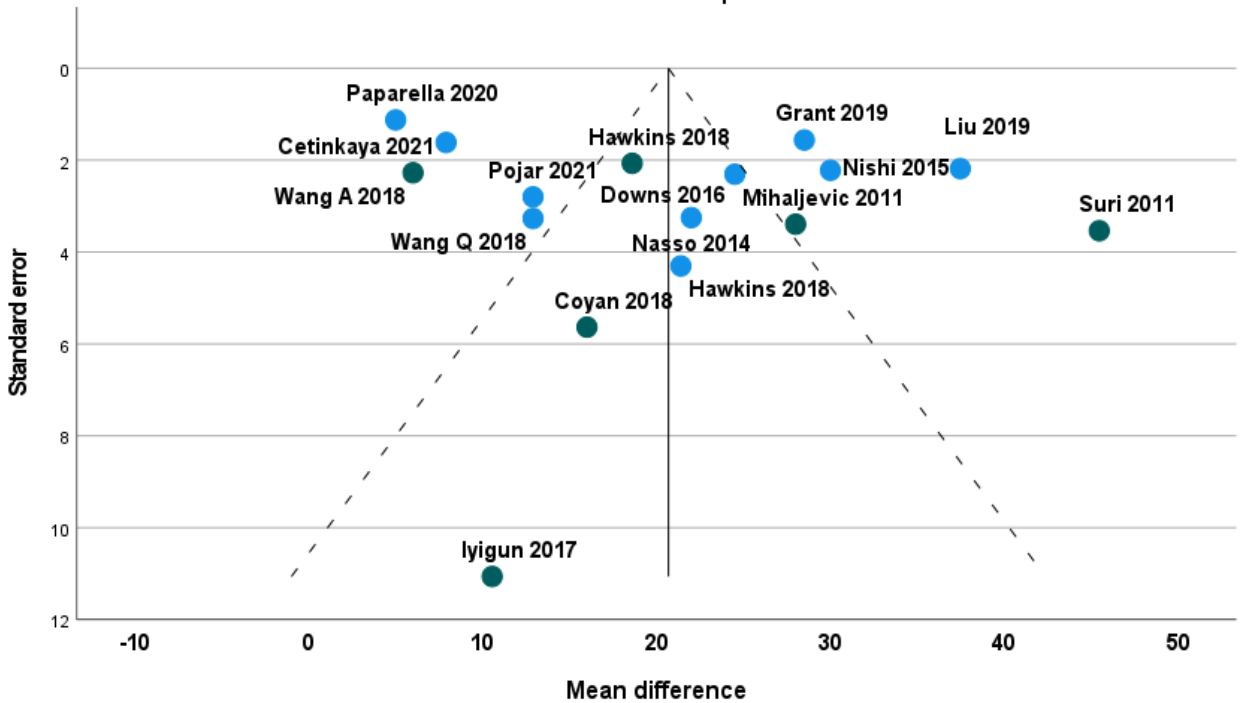



Forest Plot - CPB time

| Robotic          | ID               | Mean difference | Lower | Upper | p-value | Weight | Weight (%) |      |
|------------------|------------------|-----------------|-------|-------|---------|--------|------------|------|
| 0                | Nasso 2014       | 35.00           | 27.06 | 42.94 | 0.00    | 0.00   | 6.40       |      |
|                  | Nishi 2015       | 50.00           | 44.32 | 55.68 | 0.00    | 0.01   | 6.66       |      |
|                  | Downs 2016       | 22.00           | 15.75 | 28.25 | 0.00    | 0.01   | 6.60       |      |
|                  | Hawkins 2018     | 42.00           | 29.65 | 54.35 | 0.00    | 0.00   | 5.74       |      |
|                  | Wang Q 2018      | 26.00           | 15.33 | 36.67 | 0.00    | 0.00   | 6.01       |      |
|                  | Grant 2019       | 53.00           | 49.11 | 56.89 | 0.00    | 0.01   | 6.82       |      |
|                  | Liu 2019         | 53.00           | 47.13 | 58.87 | 0.00    | 0.01   | 6.64       |      |
|                  | Paparella 2020   | 10.00           | 7.29  | 12.71 | 0.00    | 0.01   | 6.89       |      |
|                  | Cetinkaya 2021   | 31.00           | 26.80 | 35.20 | 0.00    | 0.01   | 6.80       |      |
|                  | Pojar 2021       | 35.00           | 28.09 | 41.91 | 0.00    | 0.01   | 6.53       |      |
|                  | Subgroup Overall | 35.66           | 26.62 | 44.71 | 0.00    |        |            |      |
|                  | 1                | Mihaljevic 2011 | 40.00 | 31.87 | 48.13   | 0.00   | 0.00       | 6.37 |
|                  |                  | Suri 2011       | 65.00 | 55.56 | 74.44   | 0.00   | 0.00       | 6.19 |
| Iyigun 2017      |                  | 34.00           | 6.24  | 61.76 | 0.02    | 0.00   | 3.35       |      |
| Hawkins 2018     |                  | 30.00           | 24.04 | 35.96 | 0.00    | 0.01   | 6.63       |      |
| Wang A 2018      |                  | 25.00           | 18.87 | 31.13 | 0.00    | 0.01   | 6.62       |      |
| Coyan 2018       |                  | 39.00           | 26.65 | 51.35 | 0.00    | 0.00   | 5.74       |      |
| Subgroup Overall |                  | 38.95           | 26.87 | 51.04 | 0.00    |        |            |      |
| Overall          |                  | 36.81           | 29.75 | 43.87 | 0.00    |        |            |      |

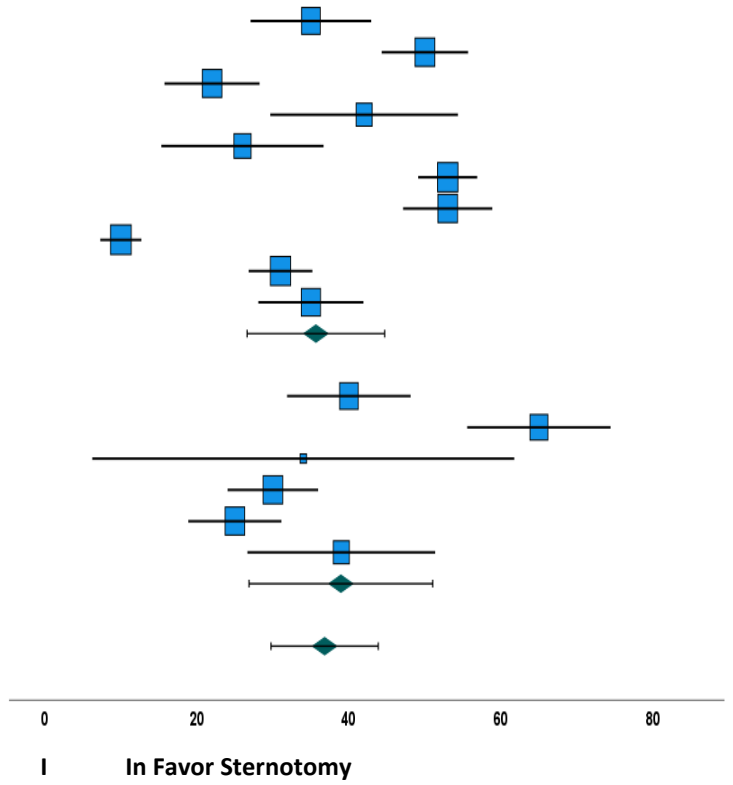

Model: Random-effects model  
 Heterogeneity: Tau-squared = 186.19, I-squared = 21.09, I-squared = 0.95  
 Homogeneity: Q = 524.67, df = 15, p-value = 0.00  
 Test of overall effect size: z = 10.22, p-value = 0.00  
 Test of between-subgroup homogeneity: Q = 0.18, df = 1, p-value = 0.67

Funnel Plot - CPB time

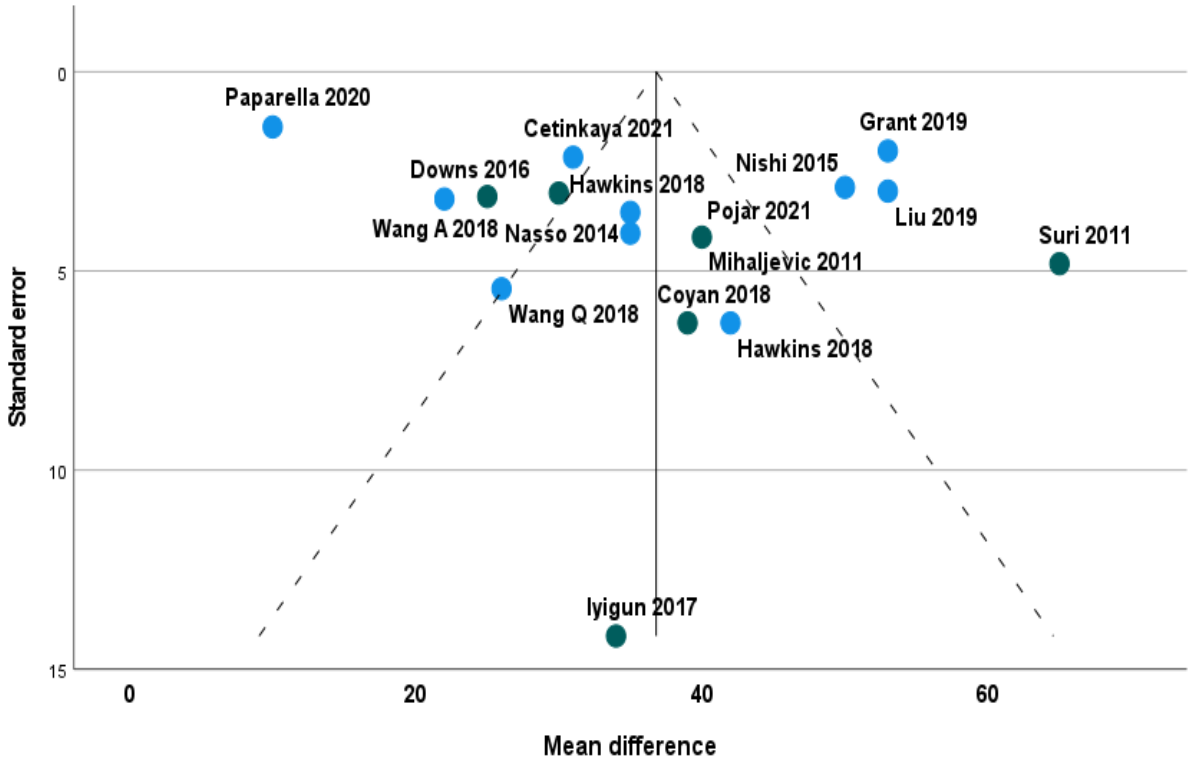

Forest Plot - Total operative time

| Robotic | ID               | Mean difference | Lower | Upper  | p-value | Weight | Weight (%) |
|---------|------------------|-----------------|-------|--------|---------|--------|------------|
| 0       | Hasso 2014       | 43.00           | 11.86 | 74.14  | 0.01    | 0.00   | 8.80       |
|         | Nishi 2015       | 45.00           | 37.03 | 52.97  | 0.00    | 0.00   | 11.63      |
|         | Hawkins 2018     | 54.30           | 41.01 | 67.59  | 0.00    | 0.00   | 11.18      |
|         | Wang 2018        | 18.90           | 4.68  | 33.12  | 0.01    | 0.00   | 11.08      |
|         | Liu 2019         | 20.18           | 10.06 | 30.30  | 0.00    | 0.00   | 11.47      |
|         | Cetinkaya 2021   | 7.90            | 2.34  | 13.46  | 0.01    | 0.00   | 11.76      |
|         | Pojar 2021       | 5.60            | -6.22 | 17.42  | 0.35    | 0.00   | 11.32      |
|         | Subgroup Overall | 26.85           | 12.19 | 41.50  | 0.00    |        |            |
| 1       | Mihaljevic 2011  | 60.00           | 52.65 | 67.35  | 0.00    | 0.00   | 11.67      |
|         | Hawkins 2018     | 87.60           | 73.53 | 101.67 | 0.00    | 0.00   | 11.10      |
|         | Subgroup Overall | 73.12           | 46.11 | 100.14 | 0.00    |        |            |
| Overall | 37.78            | 19.68           | 55.87 | 0.00   |         |        |            |

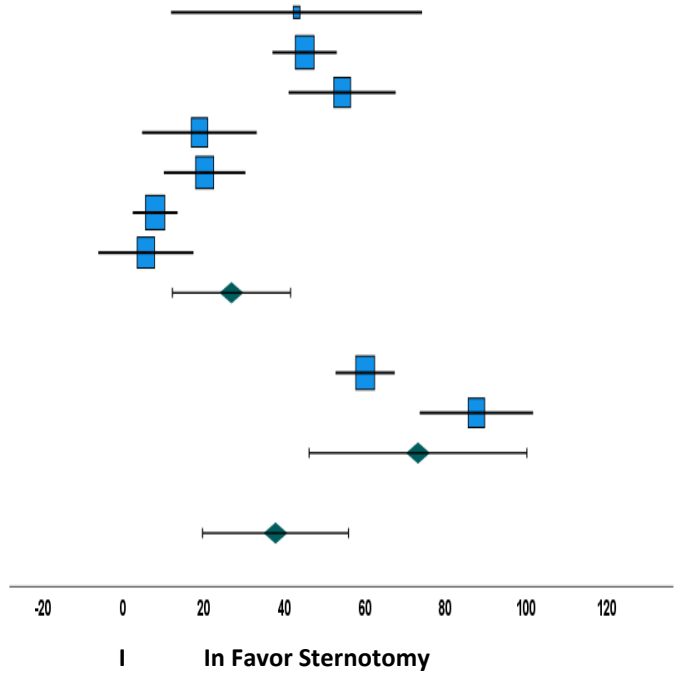

Model: Random-effects model

Heterogeneity: Tau-squared = 716.35, I-squared = 29.06, H-squared = 0.97

Homogeneity: Q = 237.11, df = 8, p-value = 0.00

Test of overall effect size: z = 4.09, p-value = 0.00

Test of between-subgroup homogeneity: Q = 8.71, df = 1, p-value = 0.00

Funnel Plot - Total operative time

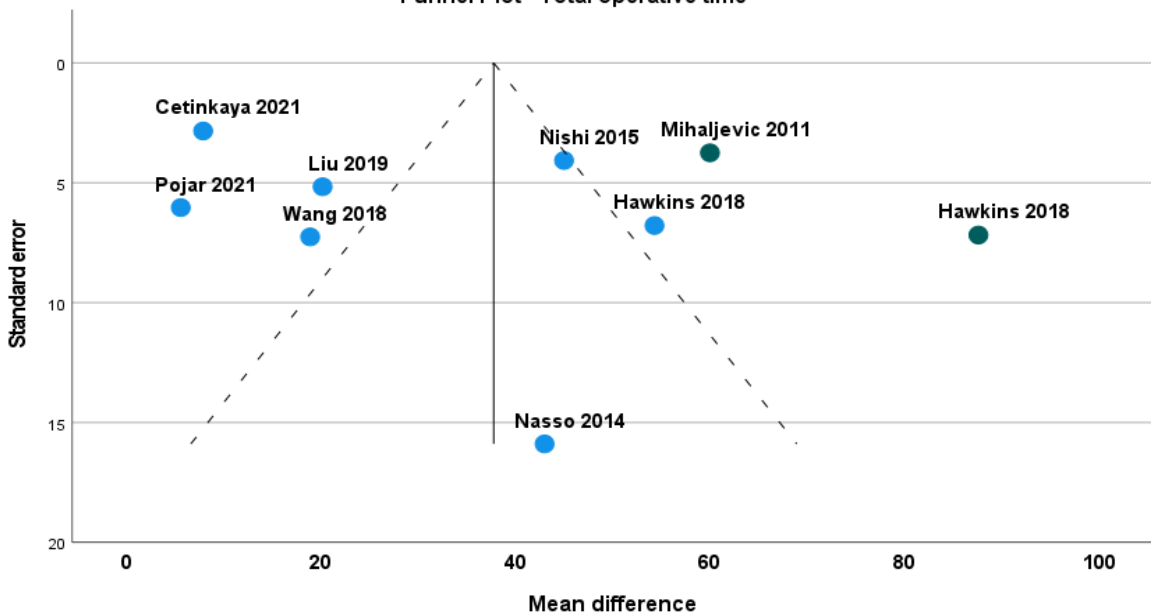

### Forest Plot - Ventilation time

| Robotic        | ID                      | Mean difference | Lower         | Upper        | p-value     | Weight | Weight (%) |
|----------------|-------------------------|-----------------|---------------|--------------|-------------|--------|------------|
| 0              | Nasso 2014              | -24.00          | -27.53        | -20.47       | 0.00        | 0.01   | 12.15      |
|                | Downs 2016              | -0.56           | -0.90         | -0.22        | 0.00        | 0.01   | 12.67      |
|                | Hawkins 2018            | -3.60           | -4.95         | -2.25        | 0.00        | 0.01   | 12.60      |
|                | Wang 2018               | 0.60            | -0.03         | 1.23         | 0.06        | 0.01   | 12.66      |
|                | Liu 2019                | -6.08           | -9.14         | -3.02        | 0.00        | 0.01   | 12.28      |
|                | Cetinkaya 2021          | -2.00           | -2.61         | -1.39        | 0.00        | 0.01   | 12.66      |
|                | Pojar 2021              | -7.90           | -9.99         | -5.81        | 0.00        | 0.01   | 12.49      |
|                | <b>Subgroup Overall</b> | <b>-6.10</b>    | <b>-12.19</b> | <b>-0.01</b> | <b>0.05</b> |        |            |
| 1              | Suri 2011               | 5.94            | 3.77          | 8.11         | 0.00        | 0.01   | 12.48      |
|                | <b>Subgroup Overall</b> | <b>5.94</b>     | <b>3.77</b>   | <b>8.11</b>  | <b>0.00</b> |        |            |
| <b>Overall</b> |                         | <b>-4.61</b>    | <b>-10.65</b> | <b>1.43</b>  | <b>0.13</b> |        |            |

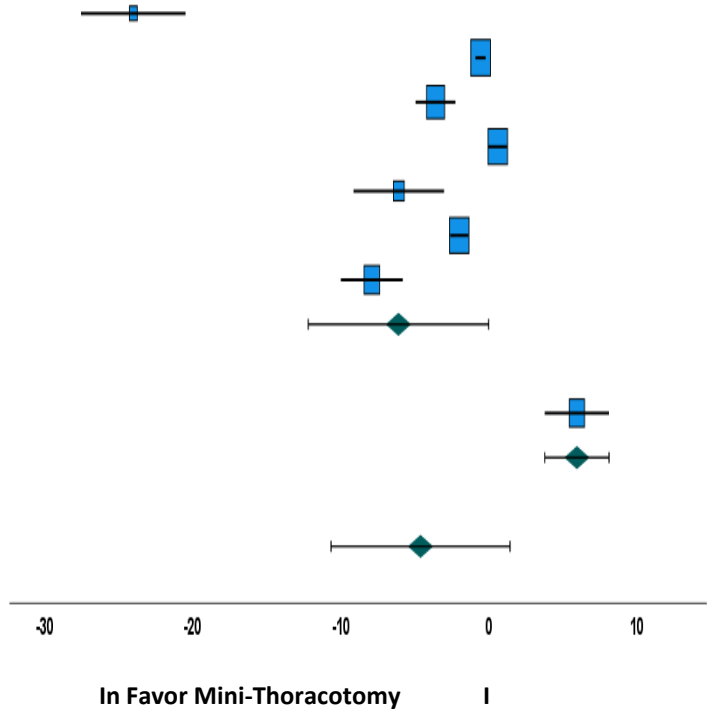

Model: Random-effects model

Heterogeneity: Tau-squared = 74.92, I-squared = 374.59, H-squared = 1.00

Homogeneity: Q = 310.23, df = 7, p-value = 0.00

Test of overall effect size: z = -1.50, p-value = 0.13

Test of between-subgroup homogeneity: Q = 13.33, df = 1, p-value = 0.00

### Funnel Plot - Ventilation time

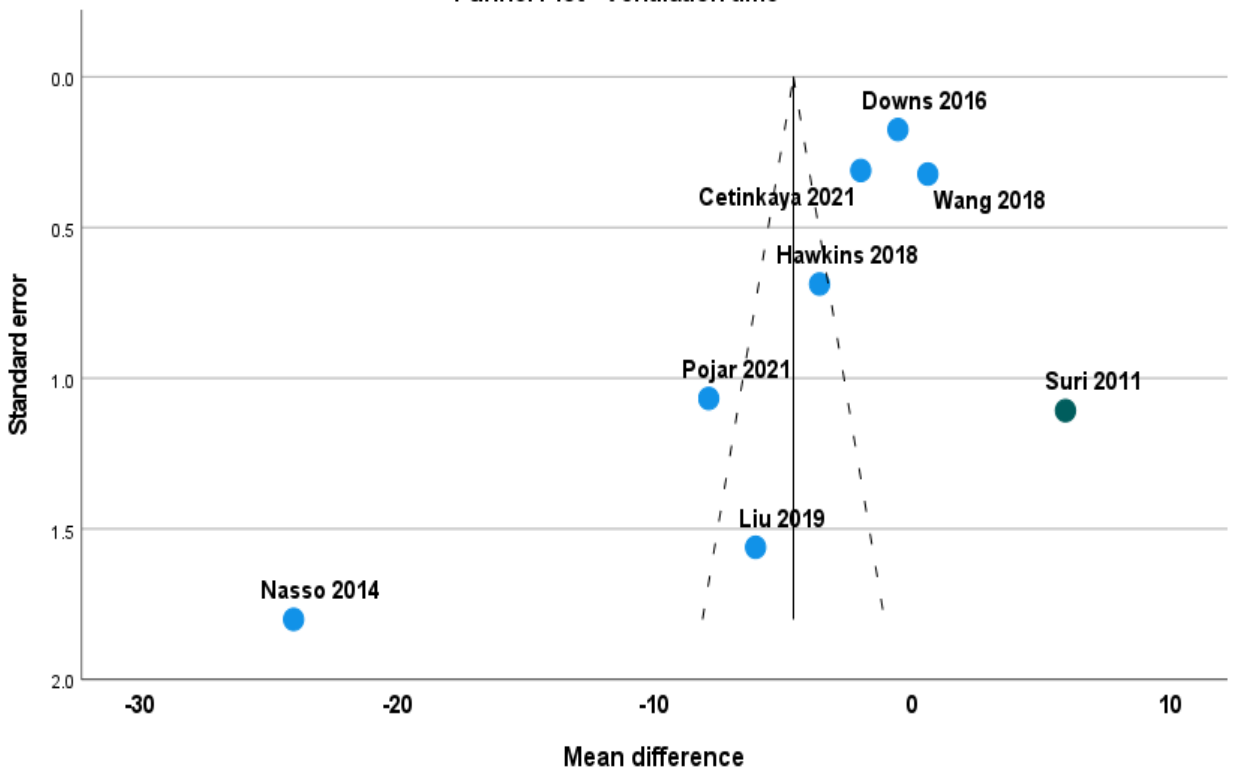

### Forest Plot - ICU stay

| Robotic                 | ID                      | Mean difference | Lower        | Upper        | p-value     | Weight      | Weight (%) |
|-------------------------|-------------------------|-----------------|--------------|--------------|-------------|-------------|------------|
| 0                       | Nasso 2014              | -1.10           | -1.43        | -0.77        | 0.00        | 1.80        | 7.53       |
|                         | Nishi 2015              | -0.20           | -0.55        | 0.15         | 0.26        | 1.78        | 7.48       |
|                         | Downs 2016              | -0.57           | -0.76        | -0.38        | 0.00        | 1.86        | 7.79       |
|                         | Hawkins 2018            | -0.38           | -1.02        | 0.26         | 0.25        | 1.57        | 6.58       |
|                         | Wang Q 2018             | -0.58           | -0.68        | -0.48        | 0.00        | 1.88        | 7.89       |
|                         | Liu 2019                | -0.70           | -1.35        | -0.05        | 0.03        | 1.57        | 6.57       |
|                         | Paparella 2020          | -0.03           | -0.08        | 0.02         | 0.27        | 1.89        | 7.91       |
|                         | Cetinkaya 2021          | -0.21           | -0.36        | -0.06        | 0.01        | 1.87        | 7.84       |
|                         | Pojar 2021              | -0.50           | -1.36        | 0.36         | 0.25        | 1.39        | 5.83       |
| <b>Subgroup Overall</b> |                         | <b>-0.45</b>    | <b>-0.69</b> | <b>-0.22</b> | <b>0.00</b> |             |            |
| 1                       | Suri 2011               | 0.22            | -0.70        | 1.14         | 0.64        | 1.34        | 5.61       |
|                         | Iyigun 2017             | -0.16           | -0.46        | 0.14         | 0.30        | 1.81        | 7.58       |
|                         | Hawkins 2018            | -0.45           | -0.63        | -0.27        | 0.00        | 1.86        | 7.80       |
|                         | Wang A 2018             | -0.75           | -1.02        | -0.48        | 0.00        | 1.82        | 7.64       |
|                         | Coyan 2018              | -3.50           | -4.32        | -2.68        | 0.00        | 1.42        | 5.95       |
|                         | <b>Subgroup Overall</b> |                 | <b>-0.91</b> | <b>-2.16</b> | <b>0.34</b> | <b>0.15</b> |            |
| <b>Overall</b>          |                         | <b>-0.61</b>    | <b>-1.01</b> | <b>-0.21</b> | <b>0.00</b> |             |            |

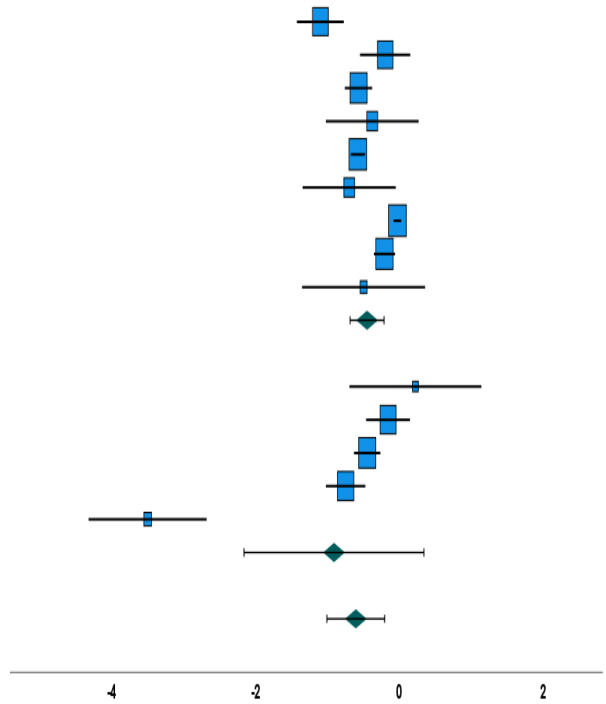

Model: Random-effects model  
 Heterogeneity: Tau-squared = 0.53, I-squared = 60.53, H-squared = 9  
 Homogeneity: Q = 226.51, df = 13, p-value = 0.00  
 Test of overall effect size: z = -2.97, p-value = 0.00  
 Test of between-subgroups homogeneity: Q = 0.50, df = 1, p-value = 0.48

In Favor Mini-Thoracotomy |

### Funnel Plot - ICU stay

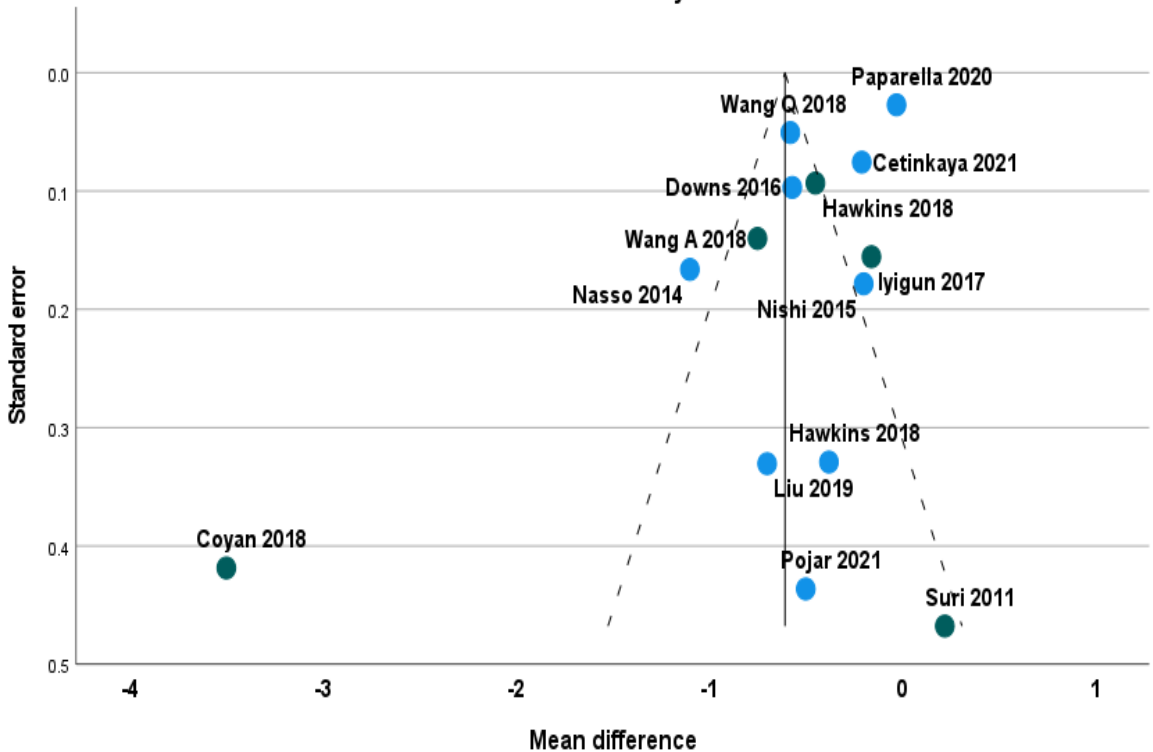

### Forest Plot - Hospital stay

| Robotic        | ID                      | Mean difference | Lower        | Upper        | p-value     | Weight | Weight (%) |
|----------------|-------------------------|-----------------|--------------|--------------|-------------|--------|------------|
| 0              | Hasso 2014              | -3.10           | -4.57        | -1.63        | 0.00        | 0.30   | 5.36       |
|                | Hishi 2015              | -3.00           | -4.02        | -1.98        | 0.00        | 0.33   | 5.88       |
|                | Downs 2016              | -1.33           | -1.71        | -0.95        | 0.00        | 0.35   | 6.36       |
|                | Hawkins 2018            | 0.00            | -0.84        | 0.84         | 1.00        | 0.34   | 6.05       |
|                | Wang Q 2018             | -3.70           | -4.96        | -2.44        | 0.00        | 0.31   | 5.61       |
|                | Grant 2019              | -1.60           | -1.92        | -1.28        | 0.00        | 0.35   | 6.38       |
|                | Liu 2019                | -5.80           | -6.82        | -4.78        | 0.00        | 0.33   | 5.88       |
|                | Paparella 2020          | -1.00           | -1.29        | -0.71        | 0.00        | 0.35   | 6.40       |
|                | Cetinkaya 2021          | -1.70           | -2.36        | -1.04        | 0.00        | 0.34   | 6.19       |
|                | Pojar 2021              | 0.10            | -1.75        | 1.95         | 0.92        | 0.27   | 4.89       |
|                | Olsthoorn 2022          | 0.30            | 0.03         | 0.57         | 0.03        | 0.36   | 6.40       |
|                | <b>Subgroup Overall</b> | <b>-1.87</b>    | <b>-2.96</b> | <b>-0.79</b> | <b>0.00</b> |        |            |
| 1              | Mihaljevic 2011         | -1.00           | -2.03        | 0.03         | 0.06        | 0.33   | 5.87       |
|                | Suri 2011               | -0.88           | -2.21        | 0.45         | 0.19        | 0.31   | 5.54       |
|                | Iyigun 2017             | -2.00           | -3.25        | -0.75        | 0.00        | 0.31   | 5.63       |
|                | Hawkins 2018            | -0.70           | -1.00        | -0.40        | 0.00        | 0.35   | 6.39       |
|                | Wang A 2018             | -1.70           | -2.09        | -1.31        | 0.00        | 0.35   | 6.36       |
|                | Coyan 2018              | -6.00           | -7.91        | -4.09        | 0.00        | 0.27   | 4.81       |
|                | <b>Subgroup Overall</b> | <b>-1.91</b>    | <b>-3.31</b> | <b>-0.51</b> | <b>0.01</b> |        |            |
| <b>Overall</b> |                         | <b>-1.88</b>    | <b>-2.72</b> | <b>-1.05</b> | <b>0.00</b> |        |            |

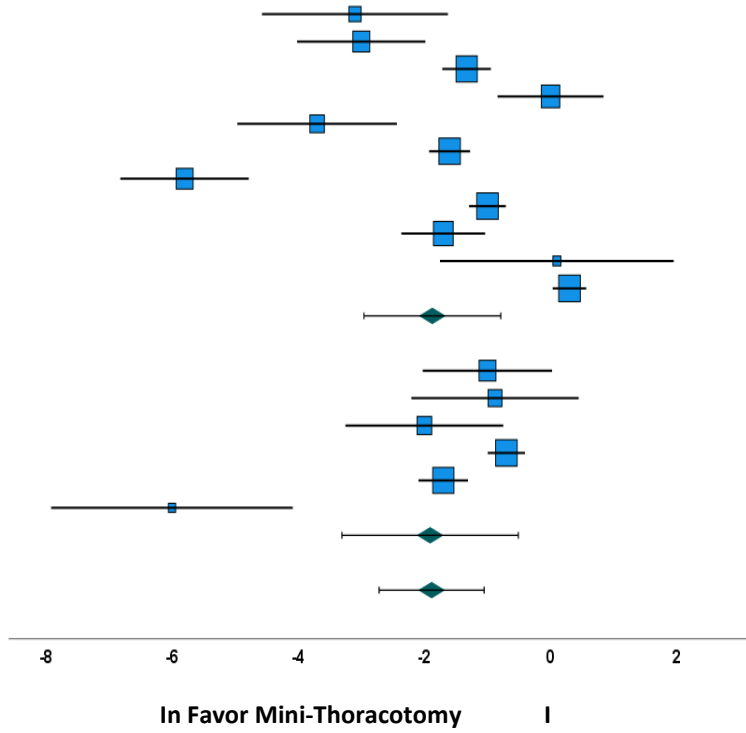

Model: Random-effects model  
 Heterogeneity: Tau-squared = 2.80, I-squared = 41.34, H-squared = 9.98  
 Homogeneity: Q = 289.00, df = 16, p-value = 0.00  
 Test of between-subgroup homogeneity: Q = 0.00, df = 1, p-value = 0.97

### Funnel Plot - Hospital stay

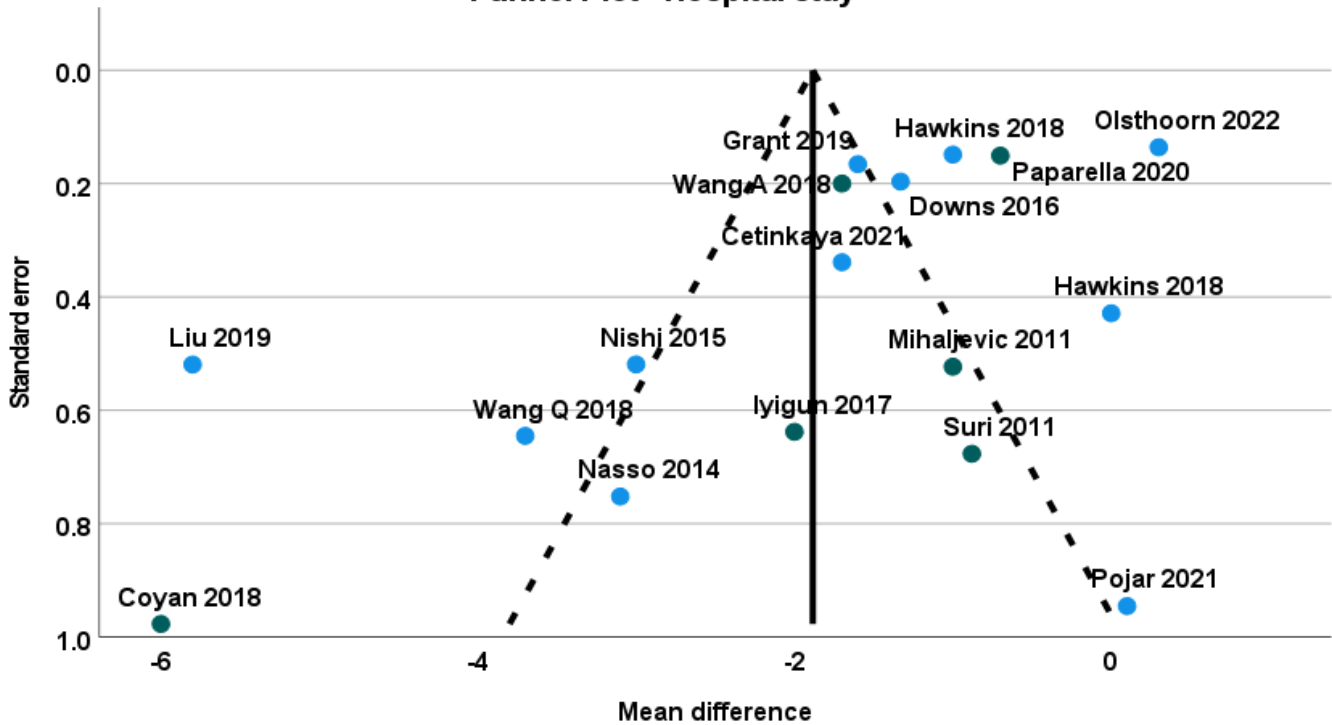

Forest Plot - Cost (USD)

| Robotic          | ID               | Mean difference | Lower     | Upper    | p-value  | Weight | Weight (%) |
|------------------|------------------|-----------------|-----------|----------|----------|--------|------------|
| 0                | Grossi 2014      | -10527.00       | -14709.69 | -6344.31 | 0.00     | 0.00   | 25.05      |
|                  | Downs 2016       | -3276.00        | -4747.12  | -1804.88 | 0.00     | 0.00   | 32.02      |
|                  | Hawkins 2018     | -5267.00        | -25081.69 | 14547.69 | 0.60     | 0.00   | 3.96       |
|                  | Pojar 2021       | -904.00         | -16518.82 | 14710.82 | 0.91     | 0.00   | 5.94       |
| Subgroup Overall |                  | -5890.34        | -11263.21 | -517.47  | 0.03     |        |            |
| 1                | Coyan 2018       | -1750.00        | -2433.91  | -1066.09 | 0.00     | 0.00   | 33.04      |
|                  | Subgroup Overall |                 | -1750.00  | -2433.91 | -1066.09 | 0.00   |            |
| Overall          |                  | -4525.81        | -8725.02  | -326.59  | 0.03     |        |            |

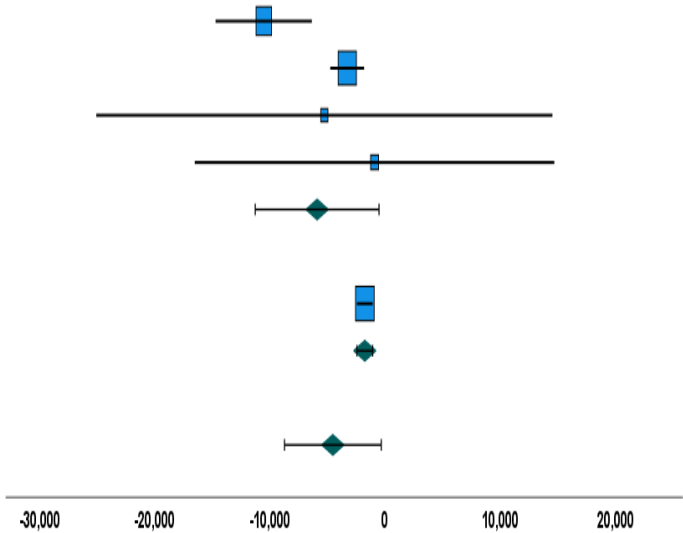

Model: Random-effects model  
 Heterogeneity: Tau-squared = 13773191.05, I-squared = 12.46, H-squared = 0.92  
 Homogeneity: Q = 19.06, df = 4, p-value = 0.00  
 Test of overall effect size: z = -2.11, p-value = 0.03  
 Test of between-subgroups homogeneity: Q = 7.74, df = 1, p-value = 0.13

In Favor Mini-Thoracotomy |

Funnel Plot - Cost (USD)

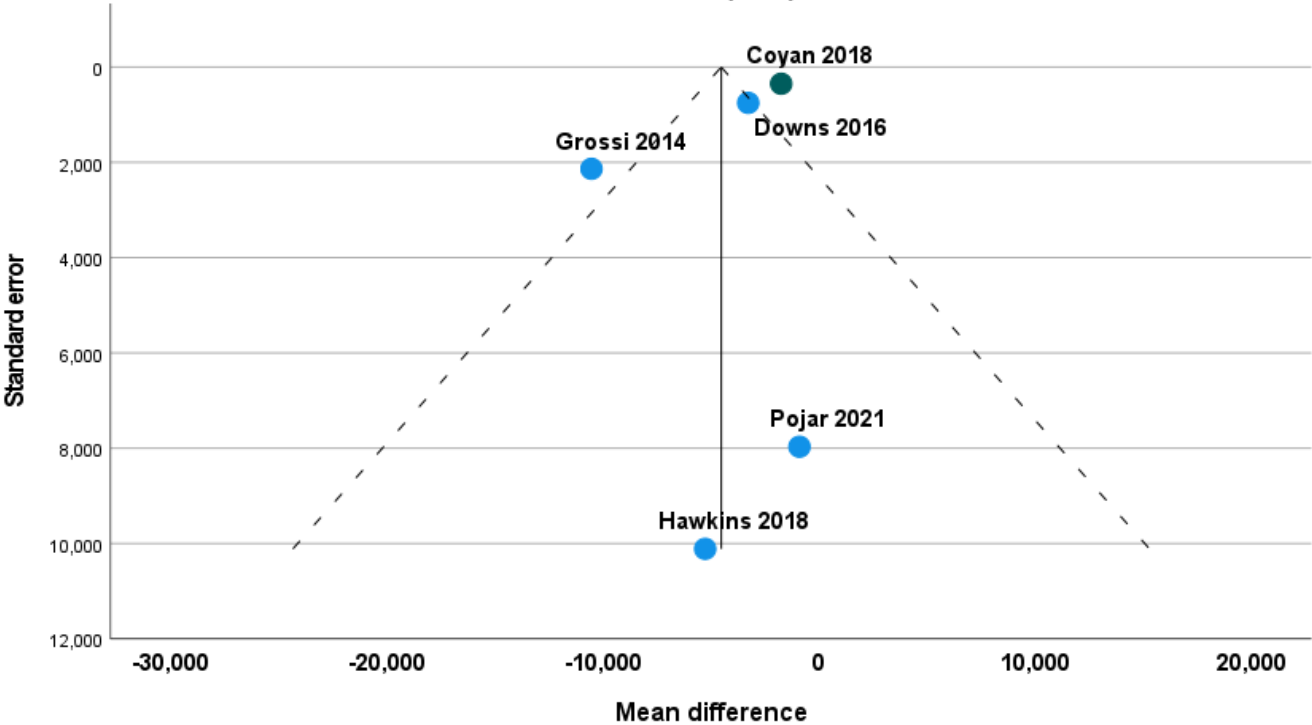

Supplement: 13019_2023_2229_MOESM2_ESM.pdf [file 13019_2023_2229_MOESM2_ESM.pdf]
